# Supplementary material for: SRF SUMOylation modulates smooth muscle phenotypic switch and vascular remodeling
Source: PubMed Central journal article supplement — Nat Commun. 2024 Aug 13;15:6919. doi: 10.1038/s41467-024-51350-5 (PMC11319592; doi:10.1038/s41467-024-51350-5), 2024-08-13
Supplement: 41467_2024_51350_MOESM1_ESM.pdf [file 41467_2024_51350_MOESM1_ESM.pdf]

## **SUPPLEMENTARY INFO**

### **SRF SUMOylation modulates smooth muscle phenotypic switch and vascular remodeling**

Yue Xu, Haifeng Zhang, Yuxin Chen, Jordan S. Pober, Min Zhou, Jenny Huanjiao Zhou and Wang Min

## SUPPLEMENTARY DATA

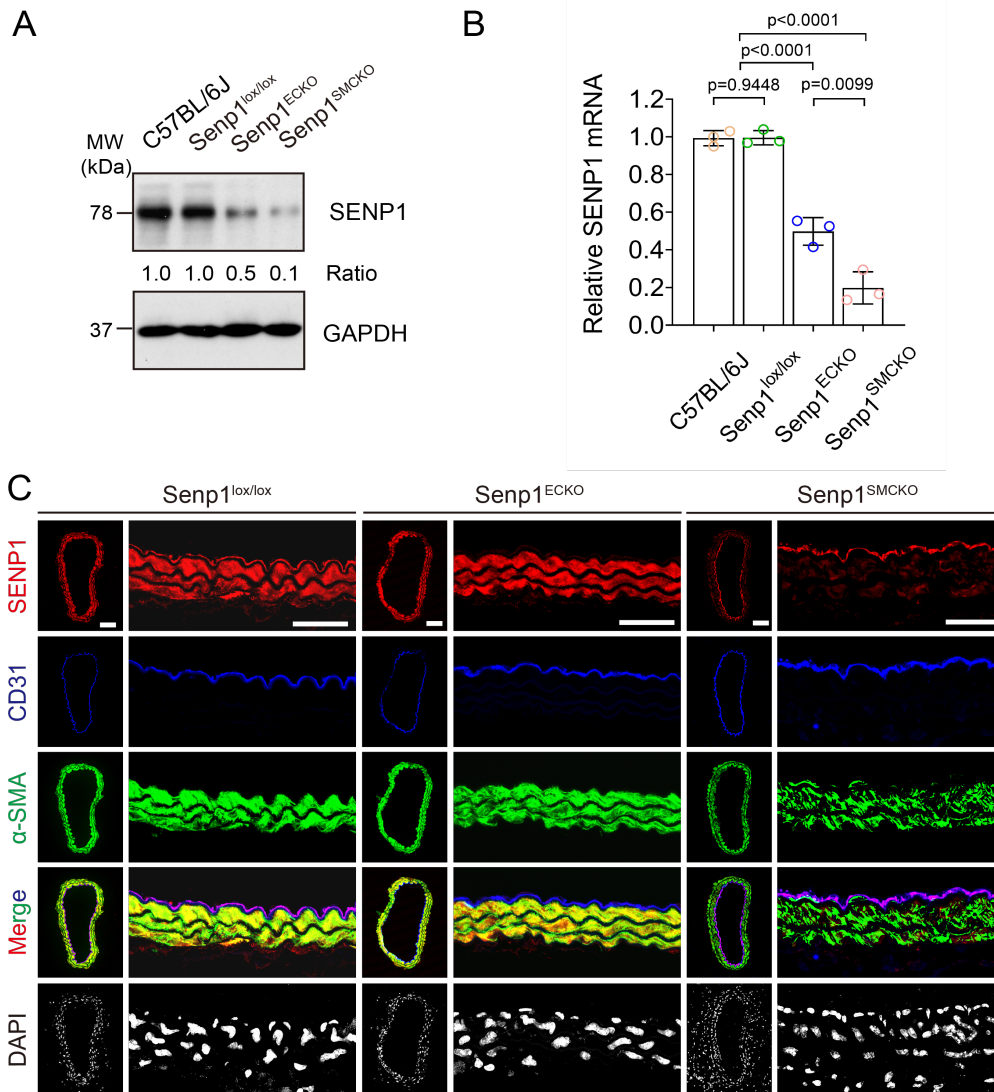

**Supplementary Fig. 1. Generation of VSMCs or ECs-specific *Senp1* gene knockout mice.** **A.** The protein levels of *Senp1* in the normal carotid arteries from C57BL/6, *Senp1*<sup>lox/lox</sup>, *Senp1*<sup>ECKO</sup> and *Senp1*<sup>SMCKO</sup> mice at age of 10-12 weeks (all in C57BL/6 background) were determined by western blot. GAPDH was served as a control. Protein bands were quantified by densitometry and fold changes are presented by taking non-injured WT carotid arteries as 1.0 (n=1). **B.** The mRNA levels of *Senp1* in the normal carotid arteries from C57BL/6, *Senp1*<sup>lox/lox</sup>, *Senp1*<sup>ECKO</sup> and *Senp1*<sup>SMCKO</sup> mice were determined by RT-PCR. GAPDH was served as a control. Relative mRNA levels are presented (n=3). Data are mean  $\pm$  SEM. One-way ANOVA with Bonferroni post hoc analysis. **C.** Immunofluorescence triple staining of normal carotid arteries with specific antibodies against *Senp1* (red),  $\alpha$ -SMA (green) and CD31 (APC-conjugated and pseudo-colored by blue). Nuclei were stained with DAPI (pseudo-colored by white). Yellow indicates the co-localization of *Senp1* with  $\alpha$ -SMA, and purple indicates the co-localization of *Senp1* with CD31 in the merged images. Scale bars, 50  $\mu$ m. Source data are provided as a Source Data file.

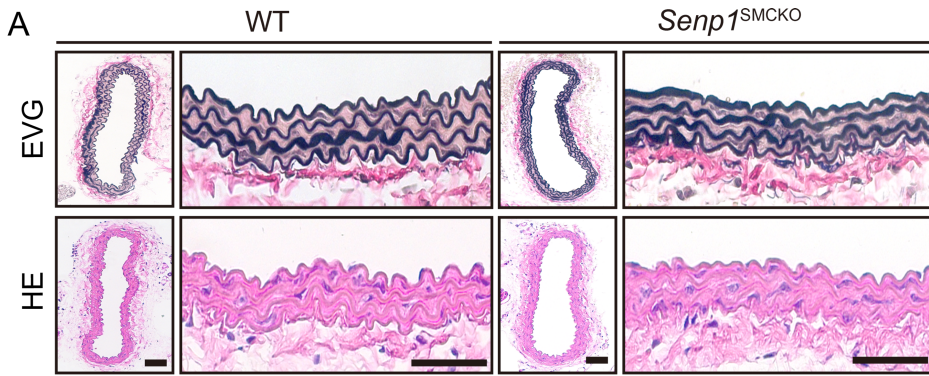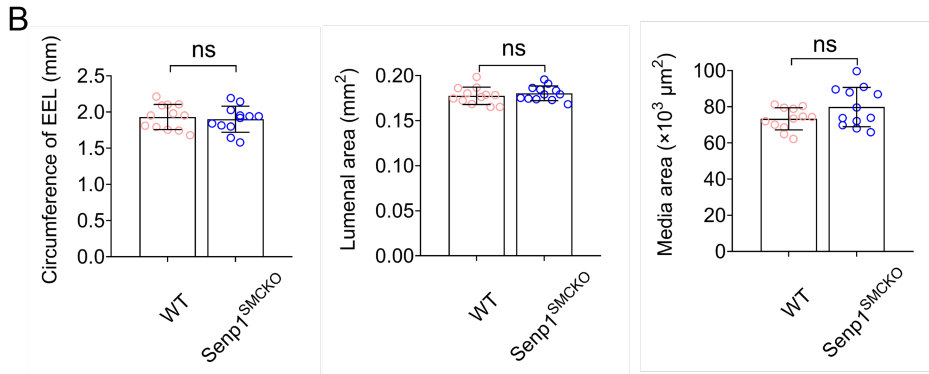

**C Gene expression altered in *Senp1<sup>SMCKO</sup>* vs WT**

| Category      | Gene    | WT       | <i>Senp1<sup>SMCKO</sup></i> | Significance |      |
|---------------|---------|----------|------------------------------|--------------|------|
| Proliferation | Ccnd1   | -0.0305  | -0.0412                      | -0.0346      |      |
|               | Pcna    | 0.449    | 0.498                        | 0.454 *      | 1.5  |
|               | Cdk2    | -0.713   | -0.823                       | -0.634 *     | 1    |
|               | Cdkn1b  | -0.314   | -0.434                       | -0.332 *     | 0.5  |
|               | Ccne1   | 0.18     | 0.212                        | 0.154 *      | 0    |
| Contractile   | Cdh13   | 0.0983   | 0.0839                       | 0.0715       | -0.5 |
|               | Acta2   | -0.871   | -0.76                        | -0.96 *      | -1   |
| Synthetic     | Myh11   | -0.428   | -0.308                       | -0.48 *      | -1.5 |
|               | Ccn1    | 0        | 0.002                        | 0.0004       |      |
|               | Tagln   | 0.018    | -0.1670715                   | 0.0021       |      |
|               | Myl6    | 0.328    | 0.386                        | 0.493 *      |      |
|               | Myl9    | -1.136   | -1.351                       | 0.133        |      |
|               | Opn     | -0.24    | -0.403                       | 0.024        |      |
|               | Myl10   | 0        | 0.003                        | -0.0004      |      |
|               | Col5a1  | -0.00049 | -0.00021                     | 0.00019      |      |
|               | Col6a2  | 0.0789   | -0.00025                     | 0.0446       |      |
|               | Col18a1 | 0.166    | 0.305                        | 0.102 *      |      |
| Inflammation  | Mmp2    | -0.674   | -0.451                       | -0.172 *     |      |
|               | Mmp9    | 1.075    | 0.911                        | 0.874 *      |      |
|               | Mmp14   | -0.476   | -0.677                       | -0.729 *     |      |
|               | Mfap5   | 0.5218   | 0.3617                       | 0.636 *      |      |
|               | Vcan    | 0.401    | 0.512                        | 0.08         |      |
| Other         | Vcam1   | 0.316    | 0.34                         | 0.67 *       |      |
|               | Cxcl1   | 0.05     | 0.0336                       | 0.036        |      |
|               | Cd68    | 0.0441   | 0.0419                       | 0.0481       |      |
|               | Il33    | 0.816    | 0.632                        | 0.485 *      |      |
|               | Il4ra   | 0.415    | 0.392                        | 0.317 *      |      |
|               | Il6ra   | 0.4528   | 0.495                        | 0.311 *      |      |
|               | Ccl3    | -0.141   | 0.00024                      | 0            |      |

**Supplementary Fig. 2. The histological and morphometric features of carotid arteries between *Senp1<sup>lox/lox</sup>* (WT) and *Senp1<sup>SMCKO</sup>* mice in baseline conditions. **A.** Representative photomicrographs of EVG staining and HE staining. **B.** The circumference of EEL, luminal area and media area in normal carotid arteries from WT and *Senp1<sup>SMCKO</sup>* mice at 10-12 weeks of age (n=12 left carotid arteries per group). Data are mean ± SEM. ns, no significance, using two-tailed Student's t-test. EVG: elastic van Gieson; HE: haematoxylin and eosin; EEL indicates external elastic lamina. Scale bars: 50 µm. **C.** Total RNAs were isolated from carotid arteries without injury and were subjected to RNA-sequencing analyses (n=3 per group). Heat map showing the gene expression of proliferation, contractile phenotype, synthetic phenotype, and inflammation in carotid arteries of WT and *Senp1<sup>SMCKO</sup>* mice. ns: no significance (p>0.05) using two-tailed Student's t-test. Source data are provided as a Source Data file.**

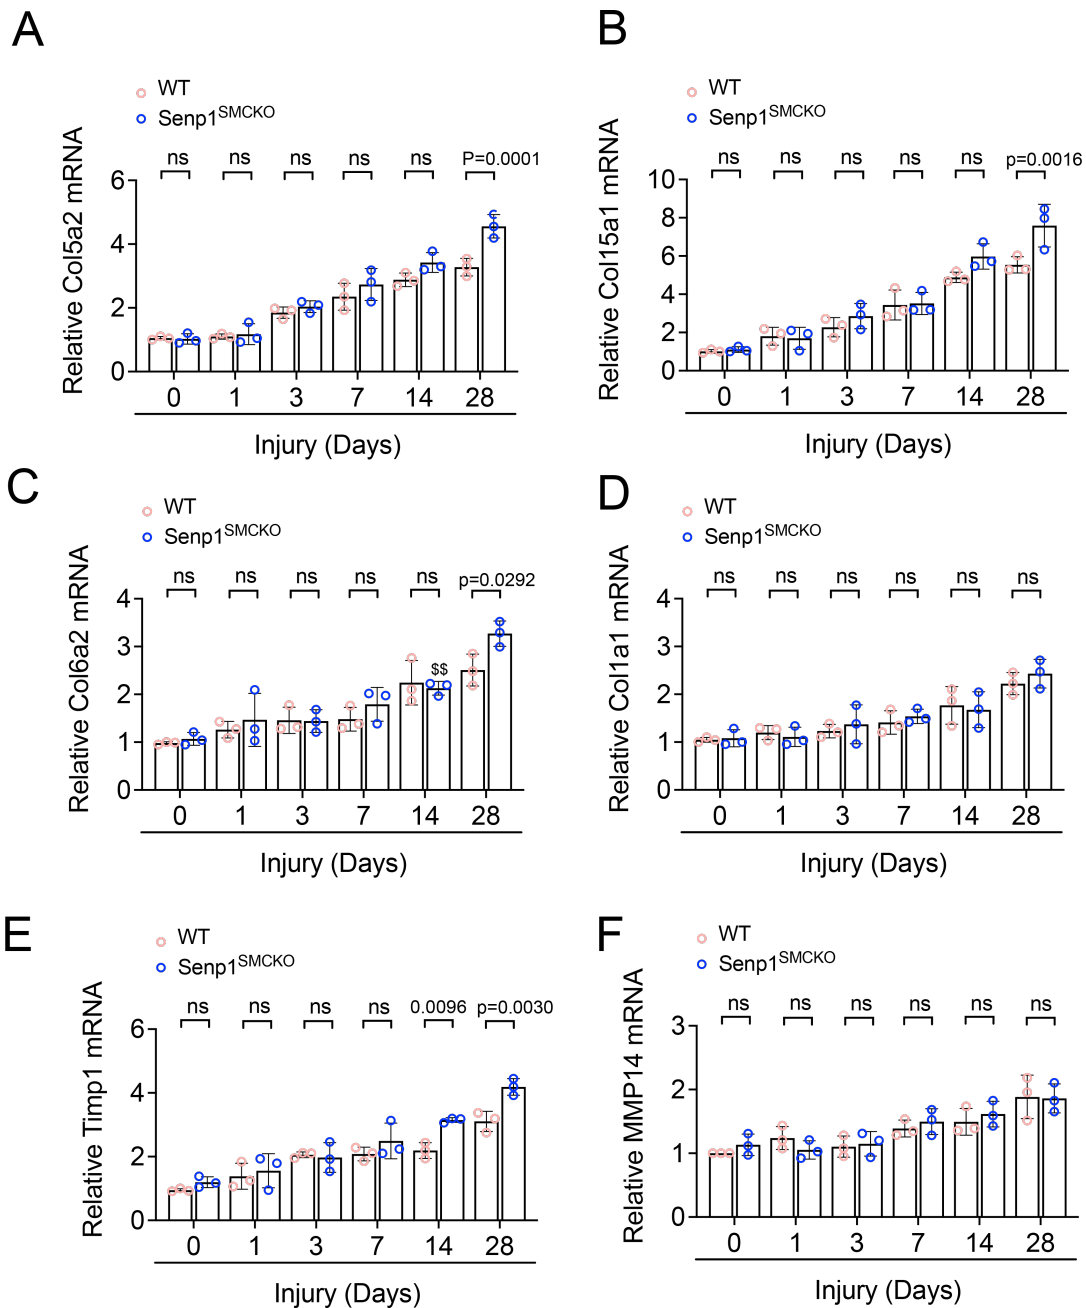

**Supplementary Fig. 3. *Senp1* deficiency in VSMCs increases multiple ECM-related genes expression during vascular remodeling.** *Senp1*<sup>lox/lox</sup> (WT) and *Senp1*<sup>SMCKO</sup> mice at age of 10-12 weeks were subjected to wire injury on left carotid arteries, and carotid arteries were harvested for analyses on day 3-28 post-injury as indicated. Non-injured mice were used as controls (time 0). Total RNAs were used for RT-PCR for mRNA levels of ECM-related genes. *Gapdh* as a control. Col15a2 (**A**), Col5a1 (**B**), Col6a2 (**C**), and Col1a1 (**D**), Timp1 (**E**) and *Mmp14* (**F**). Data are mean  $\pm$  SEM. Two-tailed Student's t-test. compared with un-injury WT mice. ns, no significance ( $p > 0.05$ ). Source data are provided as a Source Data file.

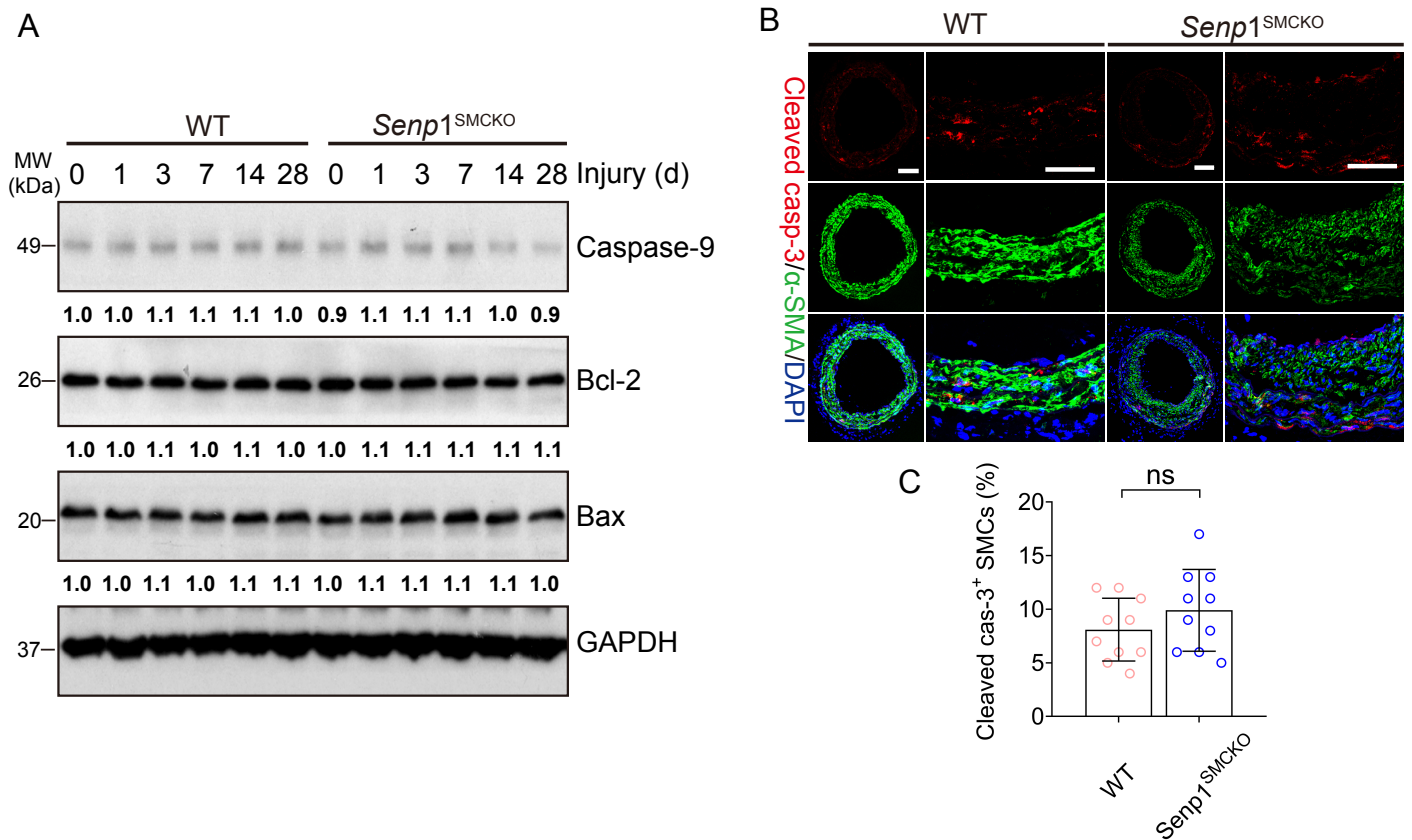

**Supplementary Fig. 4. *Senp1* deficiency in VSMCs does not affect apoptosis in neointima.** *Senp1*<sup>lox/lox</sup> (WT) and *Senp1*<sup>SMCKO</sup> mice at age of 10-12 weeks were subjected to wire injury on left carotid arteries, and carotid arteries were harvested for analyses on day 3-28 post-injury as indicated. Non-injured mice were used as controls (time 0). **A.** Western blots showing the protein levels of caspase-9, Bcl-2 and Bax in carotid arteries of WT and *Senp1*<sup>SMCKO</sup> mice. GAPDH served as the control. Each tissue sample was pooled from three individual aortas and protein bands were quantified by densitometry and fold changes are presented by taking non-injured WT carotid arteries as 1.0. Additional experiment was performed with different biological repeats presented in Supplemental Fig.12. **B.** Immunofluorescence double staining showing the expression and co-localization of cleaved caspase-3 (red) and α-SMA (green) in neointima of WT and *Senp1*<sup>SMCKO</sup> mice at 28 days after wire injury. Nuclei were stained with DAPI (blue). Scale bars: 50μm. **C.** Quantitative analysis of the percentages of cleaved caspase-3-positive stained VSMCs. Data are mean ± SEM (n=10 left carotid arteries per group). ns, no significance (P>0.05), using two-tailed Student's t-test. Source data are provided as a Source Data file.

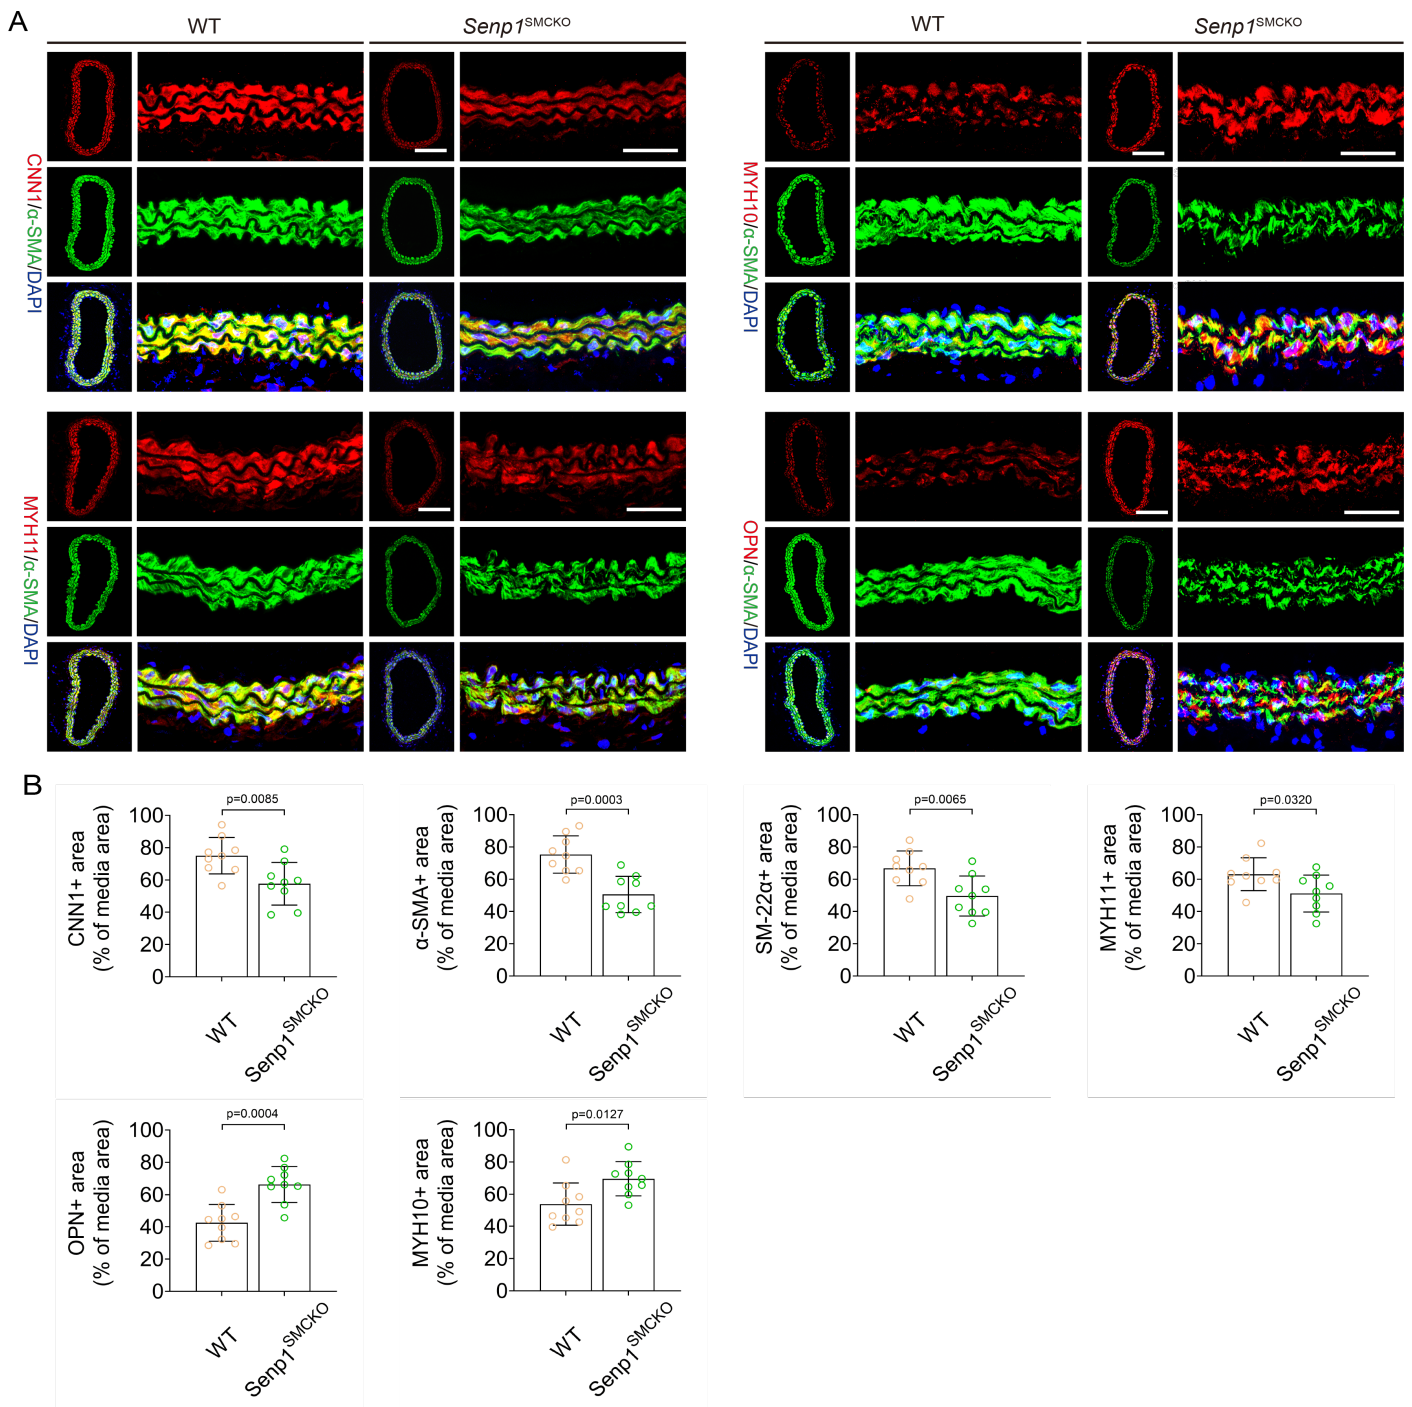

**Supplementary Fig. 5. *Senp1* deficiency in VSMCs weakly down-regulated basal levels of VSMC contractile markers.** **A.** Carotid arteries on day 0 were subjected to immunofluorescence co-staining of various contractile and synthetic markers as indicated with DAPI counterstaining for nuclei (blue). **B.** Fractional areas of each marker within the media layer was quantified (n=10 left carotid arteries per group). Data are mean ± SEM. Two-tailed Student's t-test. MFI: mean fluorescence intensity. Source data are provided as a Source Data file.

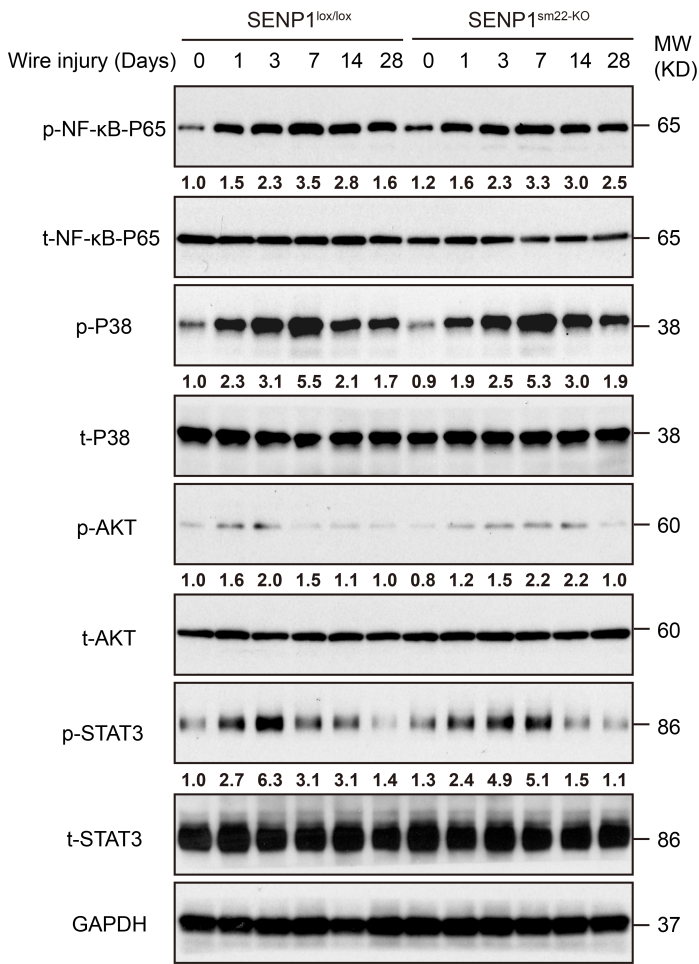

**Supplementary Fig. 6. The effect of SENP1 deficiency in VSMCs on inflammation-dependent signaling pathways.**

Western blots showing the protein levels of p-NF-κB-P65, t-NF-κB-P65, p-P38, t-P38, p-AKT, t-AKT, p-STAT3 and t-STAT3 in carotid arteries of WT and *Senp1*<sup>SMCKO</sup> mice at 0, 1, 3, 7, 14 and 28 days after wire injury. GAPDH served as the control. Each tissue sample was pooled from three individual aortas and protein bands were quantified by densitometry and fold changes are presented by taking non-injured WT carotid arteries as 1.0. Additional experiment was performed with different biological repeats presented in Supplemental Fig.12.

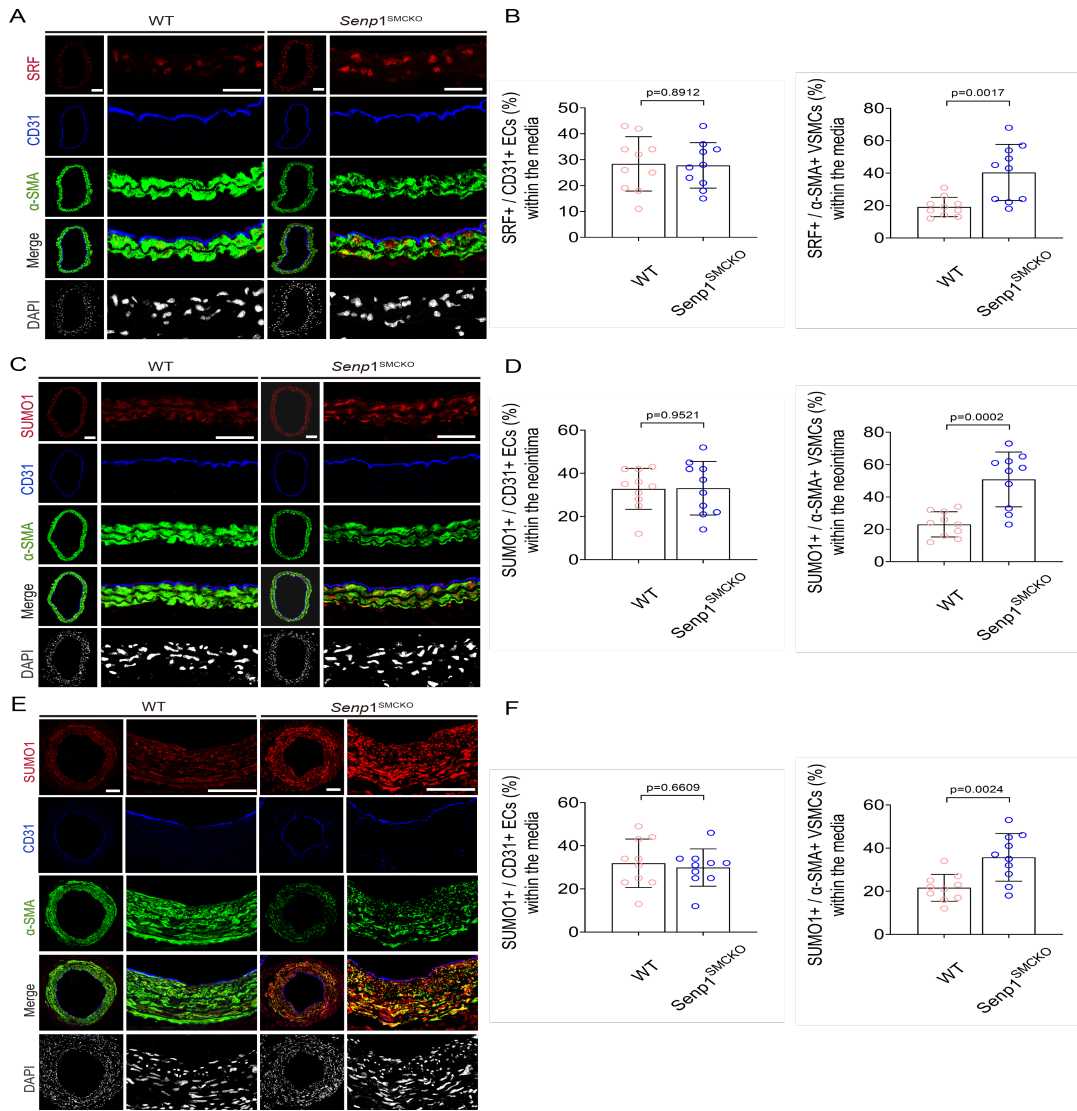

**Supplementary Fig. 7. The expressions of SRF and SUMO1 in carotid arteries between *Senp1<sup>lox/lox</sup>* (WT) and *Senp1<sup>SMCKO</sup>* mice. A-B.** Immunofluorescence staining for SRF in carotid arteries from WT and *Senp1<sup>SMCKO</sup>* mice on day 0. **(A)** Four color images are presented with SRF (red), α-SMA (green), CD31 (APC; pseudo-colored by blue) and DAPI (blue; pseudo-colored by white). **(B)** Fractional number of SRF<sup>+</sup> cells within the media layer or ECs was quantified (n=10 left carotid arteries per group). **C-D.** Immunofluorescence staining for SUMO1 in carotid arteries from WT and *Senp1<sup>SMCKO</sup>* mice on day 0. **(C)** Four color images are presented with SUMO1 (red), α-SMA (green), CD31 (APC; pseudo-colored by blue) and DAPI (blue; pseudo-colored by white). **(D)** Fractional number of SUMO1<sup>+</sup> cells within the media layer or ECs was quantified (n=10 left carotid arteries per group). **E-F.** Immunofluorescence staining for SUMO1 in carotid arteries from WT and *Senp1<sup>SMCKO</sup>* mice on day 28 post-injury. **(E)** Four color images are presented with SUMO1 (red), α-SMA (green), CD31 (APC; pseudo-colored by blue) and DAPI (blue; pseudo-colored by white). **(F)** Fractional number of SUMO1<sup>+</sup> cells within the neointimal areas and ECs were quantified (n =10 left carotid arteries per group). Data are mean ± SEM. Two-tailed Student's t-test. Scale bars, 50µm (left) and 20µm (right). Source data are provided as a Source Data file.



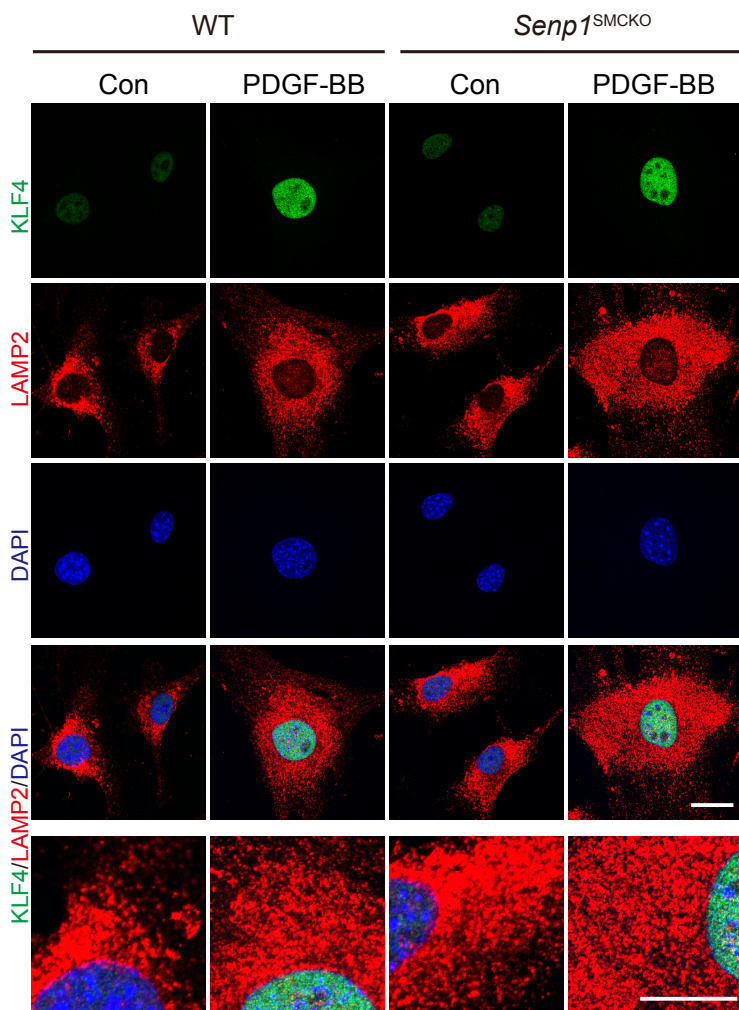

**Supplementary Fig. 8. SENP1 deletion has no effect on KLF4 cellular localization.** VSMCs Isolated from un-injured WT and *Senp1*<sup>SMCKO</sup> mice were treated with PDGF-BB for 24 h. Cells were subjected to immunofluorescence co-staining with KLF4 and LAMP2. High magnification of merged images is shown at the bottom of each panel. Lysosomal and nuclear KLF4 are indicated by arrows and arrowheads, respectively.

 Motifs with high probability  
 Motifs with low probability

Homo sapiens 129 GA VSG**AKPG**KKT RGRVK**IKME**F IDNKLRRYTT FSK**RKTG**IMK KAY 173  
 Mus musculus 125 GA VSG**AKPG**KKT RGRVK**IKME**F IDNKLRRYTT FSK**RKTG**IMK KAY 169  
 Rattus norvegicus 125 GA VSG**AKPG**KKT RGRVK**IKME**F IDNKLRRYTT FSK**RKTG**IMK KAY 169  
 Canis lupus familiaris 129 GA VSG**AKPG**KKT RGRVK**IKME**F IDNKLRRYTT FSK**RKTG**IMK KAY 173  
 Gallus gallus 69 GE RRGL**LKRG**LAE AA.....GAVSG **AKPG**KKTRGR VK**IKME**FIDN KLR 140  
 143 .....TT FSK**RKTG**IMK KAYELS.....SGSSLTELQV VNLDTSHN**AK SD** 492

| Homo sapiens |      |                         |       |
|--------------|------|-------------------------|-------|
| NO.          | Pos. | Group                   | Score |
| 1            | K147 | RGRVK <b>IKME</b> FIDNK | 0.94  |
| 2            | K135 | GAVSG <b>AKPG</b> KKT   | 0.62  |
| 3            | K165 | TTFSK <b>RKTG</b> IMKKA | 0.27  |

| Canis lupus familiaris |      |                         |       |
|------------------------|------|-------------------------|-------|
| NO.                    | Pos. | Group                   | Score |
| 1                      | K147 | RGRVK <b>IKME</b> FIDNK | 0.94  |
| 2                      | K135 | GAVSG <b>AKPG</b> KKT   | 0.62  |
| 3                      | K165 | TTFSK <b>RKTG</b> IMKKA | 0.27  |

| Mus musculus |      |                         |       |
|--------------|------|-------------------------|-------|
| NO.          | Pos. | Group                   | Score |
| 1            | K143 | RGRVK <b>IKME</b> FIDNK | 0.94  |
| 2            | K131 | GAVSG <b>AKPG</b> KKTRG | 0.62  |
| 3            | K161 | TTFSK <b>RKTG</b> IMKKA | 0.27  |

| Gallus gallus |      |                         |       |
|---------------|------|-------------------------|-------|
| NO.           | Pos. | Group                   | Score |
| 1             | K131 | RGRVK <b>IKME</b> FIDNK | 0.94  |
| 2             | K490 | DTSHN <b>AKSD</b>       | 0.79  |
| 3             | K75  | GERRG <b>LKRG</b> LAEAA | 0.73  |
| 2             | K119 | GAVSG <b>AKPG</b> KKTRG | 0.62  |
| 3             | K149 | TTFSK <b>RKTG</b> IMKKA | 0.27  |

| Rattus norvegicus |      |                         |       |
|-------------------|------|-------------------------|-------|
| NO.               | Pos. | Group                   | Score |
| 1                 | K143 | RGRVK <b>IKME</b> FIDNK | 0.94  |
| 2                 | K131 | GAVSG <b>AKPG</b> KKTRG | 0.62  |
| 3                 | K161 | TTFSK <b>RKTG</b> IMKKA | 0.27  |

**Supplementary Figure 9. Conservation of vertebrate SRF proteins at the SUMOylation sites.** SRF protein sequence comparison among Homo sapiens, Mus musculus, Rattus norvegicus, Canis lupus familiaris, and Gallus gallus. The potential SUMO motifs are marked in red and blue, indicating their high and moderate conservations among species, respectively.

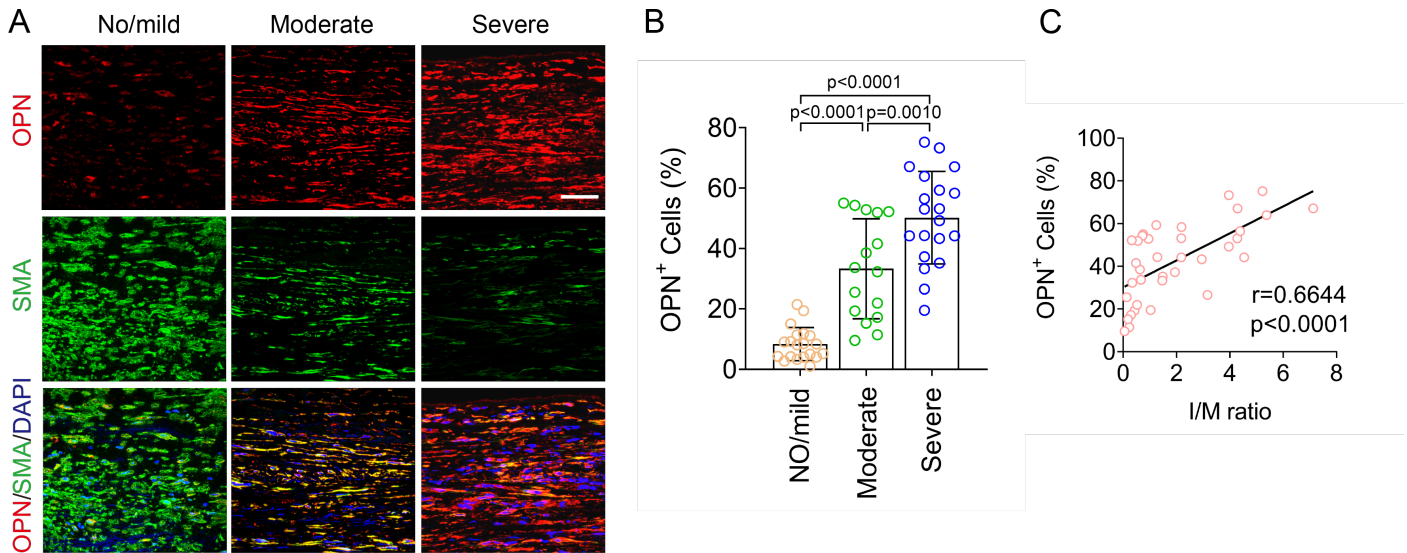

**Supplementary Figure 10. Correlations of  $\alpha$ -SMA and OPN in VSMCs with neointimal formation in human specimens.** **A.** Immunocytochemical analysis of OPN and  $\alpha$ -SMA expressions in the VSMCs of left main coronary arteries of patients with no/mild ( $n = 5$ ), moderate ( $n = 4$ ), and severe ( $n = 5$ ) CAD. Five fields per section from each sample are analyzed. Representative images of immunofluorescence staining for  $\alpha$ -SMA (green) and OPN (red). Nuclei were stained with DAPI (blue). Scale bar: 20  $\mu$ m. Yellow indicates the co-localization of OPN with  $\alpha$ -SMA and DAPI in the merged images. **B.** Quantitative analysis of OPN-positive cells in the vessel wall. Data are mean  $\pm$  SEM. One-way ANOVA with Bonferroni post hoc analysis. **(C)** Scatter plots of I/M ratio and OPN. The corresponding Spearman's correlation coefficient ( $r$ ) between I/M ratio and OPN, and the  $P$  value are shown. Data are mean  $\pm$  SEM. Correlation analyses between variables were performed using the Pearson rank correlation test.  $P$  values were two-tailed. Source data are provided as a Source Data file.

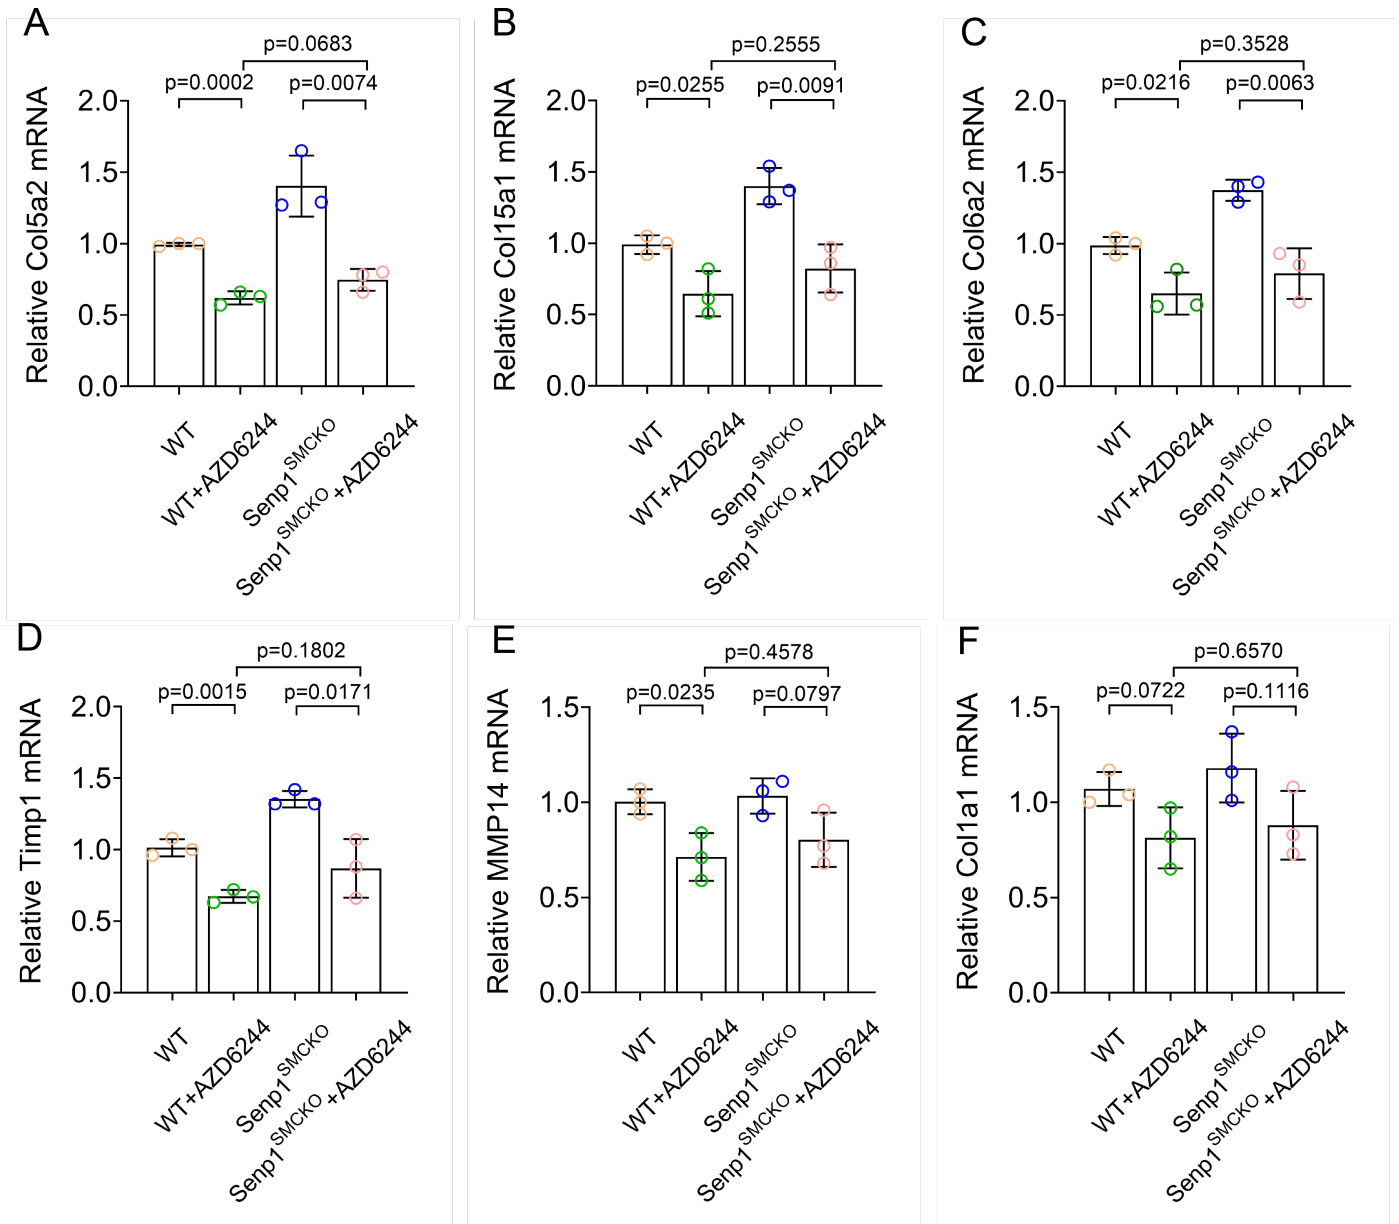

**Supplementary Fig. 11. The effect of AZD6244 on gene expression of ECM during vascular remodeling.**

**A-F.** Real-time PCR showing the mRNA levels of Col15a1 (**A**), Col5a2 (**B**), Col6a2 (**C**), Timp1 (**D**) and MMP14 (**E**) and Col1a1 (**F**) in carotid arteries of WT and *Senp1*<sup>SMCKO</sup> mice at 28 days after wire injury with or without AZD6244 treatment (n=3 per group). Gapdh served as the control. Data are mean ± SEM. One-way ANOVA with Bonferroni post hoc analysis. Source data are provided as a Source Data file.

**Supplementary Table 1:** Demographic details of the human (Han Chinese) coronary arteries samples.

|                                   | Heart disease group<br>(n=9) | Control group (n=5) |
|-----------------------------------|------------------------------|---------------------|
| Age (years)                       | 66.67±4.39                   | 50.20±4.15          |
| Female Gender, n (%)              | 2 (22.2)                     | 1 (20.0)            |
| Smokers, n (%)                    | 7 (77.8)                     | 3 (60.0)            |
| Hypertension, n (%)               | 9/(100)                      | 2/(40.0)            |
| Hypercholesterolemia, n (%)       | 3/(33.3)                     | 0/(0)               |
| Diabetes Mellitus, n (%)          | 5/(55.6)                     | 1/(20.0)            |
| Traumatic Death, n (%)            | 0/(0)                        | 5/(100)             |
| Cardiac transplantation           |                              |                     |
| No Transplantation, n (%)         | 2/(22.2)                     | 0/(0)               |
| First-time Transplantation, n (%) | 6/(66.7)                     | 0/(0)               |
| Re-transplantation, n (%)         | 1/(11.1)                     | 0/(0)               |
| Underlying Pathology              |                              |                     |
| Plaque Rupture, n (%)             | 3/(33.3)                     | 0/(0)               |
| Fibrocalcific plaque, n (%)       | 9/(100)                      | 0/(0)               |
| Fibroatheroma, n (%)              | 5/(55.6)                     | 0/(0)               |

**Supplementary Table 2.** List of RT-qPCR primers and sequences.

| Name              | Forward                           | Reverse                               |
|-------------------|-----------------------------------|---------------------------------------|
| m- $\alpha$ -SMA  | 5'-TGACCCAGATTATGTTGAGACCT-3'     | 5'-TCCAGAGTCCAGCACAATACCA-3'          |
| m-SM22 $\alpha$   | 5'-GTTCCAGACTGTTGACCTCTTTGA-3'    | 5'-TGTCTGTGAACTCCCTCTTATGCT-3'        |
| m-CNN-1           | 5'-ACGACCACCAGCGTGAGCA-3'         | 5'-CTGGGTTGACTCATTGACTCATTGACCTTCT-3' |
| m-MYH11           | 5'-TGAGCTCAGTGACAAGGTCCACAA-3'    | 5'-GGAAGCCACATCTTTGGCCAGTTT-3'        |
| m-MYH10           | 5'-CGACGCGTGCCAACGCATC-3'         | 5'-GACACAGTTGATCTTTCAGGAAGG-3'        |
| m-OPN             | 5'-GATGATGATGACGATGGAGACC-3'      | 5'-CGACTGTAGGGACGATTGGAG-3'           |
| m-SENP1           | 5'-CTGGGGAGGTGACCTTAGTGA-3'       | 5'-GTGATAATCTGGACGATAGGCTG-3'         |
| m-Col5a2          | 5'-GTGTCTGTGACAATGGTGCC-3'        | 5'-AGAGCCAGGCATGAGTCCTA-3'            |
| m-Col6a2          | 5'-GAGCGAGTCAACTCCCTGTC-3'        | 5'-CCATCCAGCAGGAAGACAAT-3'            |
| m-Col15a1         | 5'-CTGTCCACTTCCGAGCCTTT-3'        | 5'-AAAGCACTTGGCCCTTGAGA-3'            |
| m-Coll1a1         | 5'-GGCTGCACGAGTCACAC-3'           | 5'-TGGAGGGAGTTTACACGAAG-3'            |
| m-Timp1           | 5'-ACTCGGACCTGGTCATAAGGGC-3'      | 5'-TTCCGTGGCAGGCAAGCAAAGT-3'          |
| m-Mmp14           | 5'-CAAGGCCAATGTTCCGAGGAAG-3'      | 5'-TCTCCATACTCGGAAGGCCTTC-3'          |
| m- $\beta$ -actin | 5'-GGCTGTATTCCCCTCCATCG-3'        | 5'-CCAGTTGGTAACAATGCCATGT-3'          |
| m-GAPDH           | 5'-CATGAGAAGTATGACAACAGCCT-3'     | 5'-AGTCCTTCCACGATACCAAAGT-3'          |
| m-SRF             | 5'-CCAGCGCTGTCAGCAGTGCCAAC-3'     | 5'-GCTGCTCCAGCTTGTGCCCTATC-3'         |
| m-SRF-K143R       | 5'-CGCGTGAAGATCAGGATGGAGTTCATC-3' | 5'-GATGAACTCCATCCTGATCTTACGCG-3'      |
| m-SRF-K131R       | 5'-GTGAGCGGGCCAGGCCGGGAAGAAG-3'   | 5'-CTTCTCCCCGGCCTGGCCCCGCTCAC-3'      |
| m-SRF-K135R       | 5'-GTGAGCGGGCCAGGCCGGTAAGAAG-3'   | 5'-CTTCTACCCGGCCTGGCCCCGCTCAC-3'      |
| m-SRF-K161R       | 5'-TTCAGCAAGAGGAGGACGGGCATCATG-3' | 5'-CATGATGCCCGTCTCCTTGTGCTGAA-3'      |

**Supplementary Table 3: Antibodies used in this study.**

| Name              | CAS                         | Source | Dilution/IF                | Dilution/WB                                       |
|-------------------|-----------------------------|--------|----------------------------|---------------------------------------------------|
| $\alpha$ -SMA     | Sigma<br>F3777-2ML          | M      | 1:300/mouse<br>1:100/human |                                                   |
| $\alpha$ -SMA     | Invitrogen<br>14-9760-82    | M      |                            | 1:500/mouse                                       |
| SM-22 $\alpha$    | Abcam<br>ab10135            | G      | 1:50/mouse                 | 1:500/mouse                                       |
| MYH11             | Abcam<br>ab53219            | Rb     | 1:200/mouse                | 1:1000/mouse                                      |
| Calponin1 (CNN1)  | Abcam<br>ab46794            | Rb     | 1:200/mouse                | 1:500/mouse                                       |
| Osteopontin (OPN) | Abcam<br>ab8448             | Rb     | 1:200/human                |                                                   |
| Osteopontin (OPN) | Abcam<br>ab218237           | M      | 1:1000/mouse               | 1:1000/mouse                                      |
| MYH10             | Abcam<br>ab230823           | Rb     | 1:200/mouse                | 1:500/mouse                                       |
| MMP2              | Abcam<br>ab37150            | Rb     | 1:200/mouse                | 1:500/mouse                                       |
| MMP9              | Abcam<br>ab38898            | Rb     | 1:200/mouse                | 1:500/mouse                                       |
| SENP1             | Cell signaling<br>CST11929s | Rb     |                            | 1:1000/human                                      |
| SENP1             | Abcam<br>ab236094           | Rb     | 1:200/mouse                |                                                   |
| SENP1             | Life science<br>D2614000200 | Rb     |                            | 1:500/human                                       |
| SENP1             | Invitrogen<br>ZYMED383350   | Rb     | 1:200/human                | 1:500/mouse                                       |
| SENP1             | Santa cruz<br>sc271360      | M      |                            | 1:500/mouse                                       |
| SUMO1             | Cell signaling<br>CST4930s  | Rb     | 1:200/mouse<br>1:100/human |                                                   |
| SUMO1             | Santa cruz<br>sc5308        | M      |                            | 1:1000/mouse<br>1:500/human                       |
| SUMO2/3           | Santa cruz<br>sc393144      | M      | 1:200/mouse<br>1:100/human |                                                   |
| SRF               | Cell signaling<br>CST5147s  | Rb     | 1:200/mouse<br>1:100/human | 1:1000/mouse<br>1:500/human<br>1:50/mouse (Co-IP) |
| CyclinD1          | Cell signaling<br>CST2978   | Rb     |                            | 1:1000/mouse                                      |
| PCNA              | Cell signaling<br>CST13110  | Rb     |                            | 1:500/mouse                                       |
| Ki67              | Abcam<br>ab66155            | Rb     | 1:300/mouse                |                                                   |

|                        |                                 |    |             |              |
|------------------------|---------------------------------|----|-------------|--------------|
| CD31                   | Millipore<br>MAB13982           | H  | 1:500/mouse |              |
| CD31                   | R&D Systems<br>AF3628           | G  | 1:500/mouse |              |
| MLK1/MRTF-A            | Cell signaling<br>CST-14760     | Rb |             | 1:500/mouse  |
| MRTF-A                 | Santa cruz<br>sc398675          | M  |             | 1:200/mouse  |
| MRTF-A                 | Santa cruz<br>sc390324          | M  |             | 1:200/mouse  |
| Myocardin              | Novus Biologicals<br>NBP1-74113 | Rb |             | 1:500/mouse  |
| MRTF-B                 | Cell signaling<br>CST14613      | Rb |             | 1:1000/mouse |
| p-MEK1/2               | Cell signaling<br>CST2338       | Rb |             | 1:1000/mouse |
| MEK1/2                 | Cell signaling<br>CST8727       | Rb |             | 1:1000/mouse |
| p-ELK1                 | Santa cruz<br>sc8406            | M  | 1:50/mouse  | 1:200/mouse  |
| ELK1 (E-5)             | Santa cruz<br>sc365876          | M  |             | 1:500/mouse  |
| p-ERK1/2               | Cell signaling<br>CST4370s      | Rb |             | 1:1000/mouse |
| ERK1/2                 | Santa cruz<br>sc514302          | M  |             | 1:2000/mouse |
| p-NF-κB                | Cell signaling<br>CST3033s      | Rb |             | 1:1000/mouse |
| NF-κB                  | Cell signaling<br>CST8242s      | Rb |             | 1:1000/mouse |
| p-P38                  | Cell signaling<br>CST4511s      | Rb |             | 1:1000/mouse |
| P38                    | Cell signaling<br>CST8690       | Rb |             | 1:1000/mouse |
| HA-Tag                 | Cell signaling<br>CST3724       | Rb | 1:300/mouse | 1:1000/mouse |
| DYKDDDDK Tag<br>(Flag) | Cell signaling<br>CST14793      | Rb | 1:300/mouse | 1:2000/mouse |
| Cleaved caspase-3      | Cell signaling<br>CST9579T      | Rb |             | 1:200/mouse  |
| Caspase-9              | Cell signaling<br>CST9504       | Rb |             | 1:500/mouse  |
| Bcl-2                  | Cell signaling<br>CST15071      | M  |             | 1:1000/mouse |
| BAX                    | Cell signaling<br>CST14796      | Rb |             | 1:500/mouse  |
| GAPDH                  | Cell signaling                  | Rb |             | 1:5000/mouse |



|            |                            |     |       |              |
|------------|----------------------------|-----|-------|--------------|
|            | CST5174s                   |     |       | 1:5000/human |
| LAMP2      | Abcam<br>Ab13524           | Rat | 1:300 | 1:1000       |
| KLF4       | Abcam<br>Ab151733          | Rb  | 1:500 |              |
| p-SRF-S103 | Cell signaling<br>CST4261s | Rb  |       | 1:500/mouse  |
